# Supplementary material for: Age-specific relationship between the modulation of brain dynamics in response to task demands and bimanual performance
Source: Aging (Albany NY). 2026 Mar 24;18(1):159–89. doi: 10.18632/aging.206363 (PMC13285952; doi:10.18632/aging.206363)
Supplement: Supplementary Table 2 [file aging-18-1-206363-s003.docx]

**Supplementary Table 2. Detailed results from linear mixed model with BTT score as dependent variable.**

| Term  [reference level] | | Fixed Effects | | | | ANOVA Type III | |
| --- | --- | --- | --- | --- | --- | --- | --- |
|  | SE | *t* (df) | *p-*value | F-value (NumDF, DenDF) | *p-*value |
| **Right A2**  *BTTscore ~ TaskCondition * BOLDregressed + AgeGroup + BOLDregressed:AgeGroup + (1 | SubjectID)* | | | | | | | |
|  | Intercept | 40.22 | 7.81 | t(115.82) = 5.15 | < 0.001*** |  |  |
|  | Task Condition [Line 31] | -10.98 | 6.96 | t(92.50)  = -1.58 | 0.118 | F(2,92.00) = 5.56 | 0.005** |
|  | Task Condition [Angle 31] | -23.17 | 6.98 | t(91.94)  = -3.32 | 0.001** |
|  | BOLDREGRESSED | -7.44 | 24.71 | t(121.23) = -0.30 | 0.760 | F(1,95.03) = 1.97 | 0.164 |
|  | Age Group [Younger Adult] | 36.68 | 9.70 | t(88.78)  = 3.78 | < 0.001*** | F(1,88.78) = 14.31 | < 0.001*** |
|  | Task Condition [Line 31]: BOLDREGRESSED | 30.73 | 23.22 | t(92.37)  = 1.32 | 0.189 | F(2,91.93) = 0.90 | 0.412 |
|  | Task Condition [Angle 31]: BOLDREGRESSED | 20.73 | 23.21 | t(91.97)  = 0.89 | 0.374 |
|  | BOLDREGRESSED: Age Group [Younger Adult] | -65.23 | 32.60 | t(94.60)  = -2.00 | 0.048* | F(1,94.60) = 4.00 | 0.048* |
| **Right A39c**  *BTTscore ~ TaskCondition + AgeGroup + (1 | SubjectID)* | | | | | | | |
|  | Intercept | 38.13 | 2.12 | t(66.92)  = 17.96 | < 0.001*** |  |  |
|  | Task Condition [Line 31] | -1.81 | 1.61 | t(90.00)  = -1.13 | 0.262 | F(2,90) = 69.43 | < 0.001*** |
|  | Task Condition [Angle 31] | -17.24 | 1.61 | t(90.00) =  -10.72 | < 0.001*** |
|  | Age Group [Younger Adult] | 18.49 | 2.73 | t(45.00)  = 6.77 | < 0.001*** | F(1,45) = 45.87 | < 0.001*** |
| **Left A40rd**  *BTTscore ~ TaskCondition + BOLDregressed + AgeGroup + BOLDregressed:AgeGroup + (1 | SubjectID)* | | | | | | | |
|  | Intercept | 28.40 | 5.23 | t(71.25)  = 5.44 | < 0.001*** |  |  |
|  | Task Condition [Line 31] | -2.04 | 1.62 | t(89.14)  = -1.26 | 0.211 | F(2,89.41) = 66.20 | < 0.001*** |
|  | Task Condition [Angle 31] | -17.05 | 1.62 | t(89.13) =  -10.55 | < 0.001*** |
|  | BOLDREGRESSED | 31.19 | 15.53 | t(71.58)  = 2.01 | 0.048* | F(1,82.76) = 0.21 | 0.649 |
|  | Age Group [Younger Adult] | 41.12 | 9.10 | t(77.50)  = 4.52 | < 0.001*** | F(1,77.50) = 20.41 | < 0.001*** |
|  | BOLDREGRESSED: Age Group [Younger Adult] | -75.88 | 29.63 | t(81.82)  = -2.56 | 0.012* | F(1,81.82) = 6.56 | 0.012* |
| **Left A6dl**  *BTTscore ~ TaskCondition * BOLDregressed + AgeGroup + BOLDregressed:AgeGroup + (1 | SubjectID)* | | | | | | | |
|  | Intercept | 50.40 | 8.18 | t(123.78) = 6.16 | < 0.001*** |  |  |
|  | Task Condition [Line 31] | -14.13 | 8.26 | t(92.96)  = -1.71 | 0.090 | F(2,92.43) = 10.64 | < 0.001*** |
|  | Task Condition [Angle 31] | -37.98 | 8.32 | t(92.91)  = -4.56 | < 0.001*** |
|  | BOLDREGRESSED | -42.63 | 27.18 | t(127.61) = -1.57 | 0.119 | F(1,102.02) = 1.21 | 0.280 |
|  | Age Group [Younger Adult] | 29.54 | 13.03 | t(96.38)  = 2.27 | 0.026* | F(1,96.38) = 5.14 | 0.026* |
|  | Task Condition [Line 31]: BOLDREGRESSED | 42.75 | 27.95 | t(92.90)  = 1.53 | 0.130 | F(2,92.66) = 3.32 | 0.041* |
|  | Task Condition [Angle 31]: BOLDREGRESSED | 72.14 | 28.14 | t(93.50)  = 2.56 | 0.012* |
|  | BOLDREGRESSED: Age Group [Younger Adult] | -38.72 | 43.94 | t(99.57)  = -0.88 | 0.380 | F(1,99.57) = 0.78 | 0.380 |
| **Right A6dl**  *BTTscore ~ TaskCondition * BOLDregressed + AgeGroup + (1 | SubjectID)* | | | | | | | |
|  | Intercept | 50.36 | 6.72 | t(129.37) = 7.49 | < 0.001*** |  |  |
|  | Task Condition [Line 31] | -16.37 | 6.91 | t(91.81)  = -2.37 | 0.020* | F(2,92.16) = 15.49 | < 0.001*** |
|  | Task Condition [Angle 31] | -37.74 | 6.81 | t(92.45)  = -5.55 | < 0.001*** |
|  | BOLDREGRESSED | -39.00 | 19.93 | t(133.80) = -1.96 | 0.053 | F(1,101.47) = 0.02 | 0.903 |
|  | Age Group [Younger Adult] | 18.45 | 2.74 | t(45.79)  = 6.73 | < 0.001*** | F(1,45.79) = 45.31 | < 0.001*** |
|  | Task Condition [Line 31]: BOLDREGRESSED | 46.32 | 21.25 | t(91.91)  = 2.18 | 0.032* | F(2,92.30) = 5.03 | 0.009** |
|  | Task Condition [Angle 31]: BOLDREGRESSED | 65.03 | 21.01 | t(92.69)  = 3.10 | 0.003** |
| **Right A7m**  *BTTscore ~ TaskCondition + BOLDregressed + AgeGroup + (1 | SubjectID)* | | | | | | | |
|  | Intercept | 26.98 | 5.33 | t(105.99) = 5.06 | < 0.001*** |  |  |
|  | Task Condition [Line 31] | -2.18 | 1.57 | t(89.83)  = -1.39 | 0.167 | F(2,89.68) = 76.05 | < 0.001*** |
|  | Task Condition [Angle 31] | -17.70 | 1.57 | t(90.40) =  -11.27 | < 0.001*** |
|  | BOLDREGRESSED | 26.58 | 11.67 | t(114.54) = 2.28 | 0.025* | F(1,114.54) = 5.20 | 0.025* |
|  | Age Group [Younger Adult] | 17.51 | 2.79 | t(44.82)  = 6.29 | < 0.001*** | F(1,44.82) = 39.50 | < 0.001*** |
| **Left A7r**  *BTTscore ~ TaskCondition + AgeGroup + (1 | SubjectID)* | | | | | | | |
|  | Intercept | 38.13 | 2.12 | t(66.92)  = 17.96 | < 0.001*** |  |  |
|  | Task Condition [Line 31] | -1.81 | 1.61 | t(90.00)  = -1.13 | 0.062 | F(2,90) = 69.43 | < 0.001*** |
|  | Task Condition [Angle 31] | -17.24 | 1.61 | t(90.00) =  -10.72 | < 0.001*** |
|  | Age Group [Younger Adult] | 18.49 | 2.73 | t(45.00)  = 6.77 | < 0.001*** | F(1,45) = 45.87 | < 0.001*** |
| **Left lsOccG**  *BTTscore ~ TaskCondition + BOLDregressed + AgeGroup + (1 | SubjectID)* | | | | | | | |
|  | Intercept | 33.17 | 2.93 | t(92.49)  = 11.32 | < 0.001*** |  |  |
|  | Task Condition [Line 31] | -2.27 | 1.58 | t(91.12)  = -1.44 | 0.155 | F(2,90.49) = 72.87 | < 0.001*** |
|  | Task Condition [Angle 31] | -17.44 | 1.57 | t(90.10)=  -11.09 | < 0.001*** |
|  | BOLDREGRESSED | 19.49 | 8.09 | t(121.60) = 2.41 | 0.018* | F(1,121.60) = 5.81 | 0.018* |
|  | Age Group [Younger Adult] | 18.82 | 2.69 | t(44.97)  = 7.00 | < 0.001*** | F(1,44.97) = 48.99 | < 0.001*** |
| **Left mOccG**  *BTTscore8 ~ TaskCondition * BOLDregressed + AgeGroup + (1 | SubjectID)* | | | | | | | |
|  | Intercept | 43.91 | 3.97 | t(130.94) = 11.06 | < 0.001*** |  |  |
|  | Task Condition [Line 31] | -13.58 | 4.62 | t(97.88)  = -2.94 | 0.004** | F(2,95.91) = 10.61 | < 0.001*** |
|  | Task Condition [Angle 31] | -21.44 | 4.85 | t(97.88)  = -4.42 | < 0.001*** |
|  | BOLDREGRESSED | -18.67 | 10.38 | t(129.44) = -1.80 | 0.074 | F(1,131.18) = 0.01 | 0.907 |
|  | Age Group [Younger Adult] | 18.42 | 2.79 | t(46.39)  = 6.60 | < 0.001*** | F(1,46.39) = 43.62 | < 0.001*** |
|  | Task Condition [Line 31]: BOLDREGRESSED | 38.88 | 14.51 | t(97.59)  = 2.68 | 0.009** | F(2,96.84) = 3.60 | 0.031* |
|  | Task Condition [Angle 31]: BOLDREGRESSED | 13.72 | 14.86 | t(98.65)  = 0.92 | 0.358 |
| **Left V5/MT+**  *BTTscore ~ TaskCondition * BOLDregressed + AgeGroup + (1 | SubjectID)* | | | | | | | |
|  | Intercept | 42.90 | 4.88 | t(117.30) = 8.79 | < 0.001*** |  |  |
|  | Task Condition [Line 31] | -15.07 | 4.93 | t(91.69)  = -3.06 | 0.003** | F(2,91.62) = 11.77 | < 0.001*** |
|  | Task Condition [Angle 31] | -23.10 | 4.83 | t(91.82)  = -4.78 | < 0.001*** |
|  | BOLDREGRESSED | -13.31 | 11.96 | t(128.25) = -1.11 | 0.268 | F(1,94.61) = 0.19 | 0.662 |
|  | Age Group [Younger Adult] | 18.63 | 2.74 | t(45.12)  = 6.81 | < 0.001*** | F(1,45.12) = 46.37 | < 0.001*** |
|  | Task Condition [Line 31]: BOLDREGRESSED | 36.57 | 12.90 | t(45.12)  = 2.84 | 0.006** | F(2,91.96) = 4.03 | 0.021* |
|  | Task Condition [Angle 31]: BOLDREGRESSED | 16.06 | 12.42 | t(92.07)  = 1.29 | 0.199 |
| **Right V5/MT+**  *BTTscore ~ TaskCondition + AgeGroup + (1 | SubjectID)* | | | | | | | |
|  | Intercept | 38.13 | 2.12 | t(66.92)  = 17.96 | < 0.001*** |  |  |
|  | Task Condition [Line 31] | -1.81 | 1.61 | t(90.00)  = -1.13 | 0.262 | F(2,90) = 69.43 | < 0.001*** |
|  | Task Condition [Angle 31] | -17.24 | 1.61 | t(90.00) =  -10.72 | < 0.001*** |
|  | Age Group [Younger Adult] | 18.49 | 2.73 | t(45.00)  = 6.77 | < 0.001*** | F(1,45) = 45.87 | < 0.001*** |
| **Left Crus I**  *BTTscore ~ TaskCondition * BOLDregressed + AgeGroup + BOLDregressed:AgeGroup + (1 | SubjectID)* | | | | | | | |
|  | Intercept | 49.96 | 7.28 | t(122.28) = 6.86 | < 0.001*** |  |  |
|  | Task Condition [Line 31] | -21.47 | 6.35 | t(96.00)  = -3.38 | 0.001** | F(2,93.87) =  12.25 | < 0.001*** |
|  | Task Condition [Angle 31] | -32.85 | 6.69 | t(92.37)  = -4.91 | < 0.001*** |
|  | BOLDREGRESSED | -25.24 | 14.66 | t(126.99) = -1.72 | 0.088 | F(1,102.19) = 4.40 | 0.038* |
|  | Age Group [Younger Adult] | 38.80 | 10.19 | t(95.56)  = 3.81 | < 0.001*** | F(1,95.56) = 14.49 | < 0.001*** |
|  | Task Condition [Line 31]: BOLDREGRESSED | 40.76 | 13.01 | t(97.30)  = 3.13 | 0.002** | F(2,94.48) = 5.16 | 0.008** |
|  | Task Condition [Angle 31]: BOLDREGRESSED | 33.69 | 13.78 | t(92.33)  = 2.44 | 0.016* |
|  | BOLDREGRESSED: Age Group [Younger Adult] | -43.34 | 20.94 | t(100.71) = -2.07 | 0.041* | F(1,100.71) = 4.28 | 0.041* |
| **Right Crus I**  *BTTscore ~ TaskCondition + AgeGroup + (1 | SubjectID)* | | | | | | | |
|  | Intercept | 38.13 | 2.12 | t(66.92)  = 17.96 | < 0.001*** |  |  |
|  | Task Condition [Line 31] | -1.81 | 1.61 | t(90.00)  = -1.13 | 0.262 | F(2,90.00) = 69.43 | < 0.001*** |
|  | Task Condition [Angle 31] | -17.24 | 1.61 | t(90.00) =  -10.72 | < 0.001*** |
|  | Age Group [Younger Adult] | 18.49 | 2.73 | t(45.00)  = 6.77 | < 0.001*** | F(1,45.00) = 45.87 | < 0.001*** |
| **Right VI**  *BTTscore ~ TaskCondition + AgeGroup + (1 | SubjectID)* | | | | | | | |
|  | Intercept | 38.13 | 2.12 | t(66.92)  = 17.96 | < 0.001*** |  |  |
|  | Task Condition [Line 31] | -1.81 | 1.61 | t(90.00)  = -1.13 | 0.262 | F(2,90.00) = 69.43 | < 0.001*** |
|  | Task Condition [Angle 31] | -17.24 | 1.61 | t(90.00) =  -10.72 | < 0.001*** |
|  | Age Group [Younger Adult] | 18.49 | 2.73 | t(45.00)  = 6.77 | < 0.001*** | F(1,45.00) = 45.87 | < 0.001*** |
| **Left VIIb**  *BTTscore ~ TaskCondition + AgeGroup + (1 | SubjectID)* | | | | | | | |
|  | Intercept | 38.13 | 2.12 | t(66.92) = 17.96 | < 0.001*** |  |  |
|  | Task Condition [Line 31] | -1.81 | 1.61 | t(90.00)  = -1.13 | 0.262 | F(2,90.00) = 69.43 | < 0.001*** |
|  | Task Condition [Angle 31] | -17.24 | 1.61 | t(90.00) =  -10.72 | < 0.001*** |
|  | Age Group [Younger Adult] | 18.49 | 2.73 | t(45.00)  = 6.77 | < 0.001*** | F(1,45.00) = 45.87 | < 0.001*** |
| **Left VIIIb**  *BTTscore ~ TaskCondition * BOLDregressed + AgeGroup + BOLDregressed:AgeGroup + (1 | SubjectID)* | | | | | | | |
|  | Intercept | 44.17 | 6.83 | t(120.28) = 6.46 | < 0.001*** |  |  |
|  | Task Condition [Line 31] | -16.59 | 5.95 | t(91.50)  = -2.79 | 0.007** | F(2,91.85) = 11.74 | < 0.001*** |
|  | Task Condition [Angle 31] | -28.94 | 5.98 | t(92.23)  = -4.84 | < 0.001*** |
|  | BOLDREGRESSED | -8.60 | 8.37 | t(128.16) = -1.03 | 0.306 | F(1,85.96) = 0.13 | 0.718 |
|  | Age Group [Younger Adult] | 27.59 | 11.73 | t(82.53)  = 2.35 | 0.021* | F(1,82.53) = 5.53 | 0.021* |
|  | Task Condition [Line 31]: BOLDREGRESSED | 20.12 | 7.86 | t(91.47)  = 2.35 | 0.012* | F(2,91.77) = 3.59 | 0.032* |
|  | Task Condition [Angle 31]: BOLDREGRESSED | 16.13 | 7.86 | t(92.47) = 2.05 | 0.043* |
|  | BOLDREGRESSED: Age Group [Younger Adult] | -12.95 | 16.53 | t(85.03)  = -0.78 | 0.435 | F(1,85.03) = 0.61 | 0.435 |

*Note.* Detailed results from the fixed effects and ANOVA tables derived from the Linear Mixed Models conducted separately for each ROI, examining the relationship between TASK CONDITION, BOLDREGRESSED (BOLD SD after regressing out framewise displacement), AGE GROUP, the two-way interactions of BOLDREGRESSED with the two other predictors (TASK CONDITION X BOLDREGRESSED and AGE GROUP X BOLDREGRESSED), and BTT SCORE, while controlling for SUBJECT as a random effect. Model formulas reflect the final statistical model employed for each ROI after stepwise removal of non-significant predictors. Significance levels: * *p* < 0.05, ** *p* < 0.01, *** *p* < 0.001. Abbreviations: ANOVA = Analysis of Variance; = Coefficient Estimate; DenDF = Denominator Degrees of Freedom; NumDF = Numerator Degrees of Freedom; ROI = Region of Interest; SE = Standard Error.
